# Supplementary material for: The metabolic regulator USF1 is involved in the control of affective behaviour in mice
Source: Research Square preprint supplement (doi:10.21203/rs.3.rs-1733127/v1), 2022-06-16
Supplement: Supplementary file 1 [file a71659d217cc6eba7d2efce7.docx]

**Supplementary Figure 1. Bioinformatic analysis of top 100 differentially expressed genes (DEG) in the USF1 KO hippocampus.**

**A)** ‘ENCODE and ChEA Consensus TFs from ChIP-X’ enrichment analysis of top 100 DEG. **B)** ‘GO Biological Process’ enrichment analysis of top 100 DEG. **C)** ‘GO Molecular Function’ enrichment analysis of top 100 DEG.
